# Supplementary material for: Giant beaver palaeoecology inferred from stable isotopes
Source: PubMed Central journal article supplement (PMC6509321; doi:10.1038/s41598-019-43710-9), 2019-05-09
Supplement: 41598_2019_43710_MOESM1_ESM.pdf [file 41598_2019_43710_MOESM1_ESM.pdf]

1 Giant beaver palaeoecology inferred from stable isotopes

2

3 Tessa Plint, Fred J. Longstaffe, Grant Zazula

4

5 *Collagen sample preparation and stable isotope analysis*

6 Collagen extraction was performed using a modified Longin (1971) method. The extraction  
7 procedure was virtually identical for ancient and modern rodent skeletal samples. All *Castoroides*  
8 specimens were documented as adult individuals (based on size). Crushed bone and dentin samples  
9 (500 mg) underwent lipid extraction using a 2:1 solution of chloroform and methanol. Samples  
10 were then demineralized in 0.5 M hydrochloric acid (HCl) at room temperature. Demineralized  
11 samples were soaked in a 0.1 M sodium hydroxide (NaOH) solution to remove humic acids.  
12 Collagen was gelatinized in pH 3 0.25 M HCl at 90°C for 16 hours, and then desiccated at 90°C  
13 for 24 hours. Collagen samples were analyzed using a Costech Elemental Analyzer coupled with  
14 a Thermo Scientific Delta Plus XL isotope ratio mass spectrometer operated in continuous-flow  
15 mode with helium as the carrier gas. Stable carbon and nitrogen isotope results were calibrated to  
16 VPDB and AIR respectively, using international standards USGS-40 ( $\delta^{13}\text{C}$ :  $\pm 0.2$  ‰ 1SD, n = 8,  
17 accepted  $-26.4$  ‰;  $\delta^{15}\text{N}$ :  $\pm 0.1$  ‰ 1SD, n = 8, accepted  $-4.5$  ‰) and USGS-41 ( $\delta^{13}\text{C}$ :  $\pm 0.4$  ‰  
18 1SD, n = 9, accepted  $+37.6$  ‰;  $\delta^{15}\text{N}$ :  $\pm 0.1$  ‰ 1SD, n = 9 accepted  $+47.6$  ‰). Keratin powder (in-  
19 house standard, MP Biomedicals Inc., Cat No. 90211, Lot No. 9966H) and IAEA-CH-6 were  
20 analyzed as unknowns to test for accuracy and precision. Keratin measured  $\delta^{13}\text{C} = -24.1 \pm 0.1$  ‰  
21 (mean  $\pm$  1SD, n = 18; internally calibrated  $-24.1$  ‰), and keratin measured  $\delta^{15}\text{N} = +6.36 \pm 0.1$  ‰  
22 (mean  $\pm$  1SD, n = 18; internally calibrated  $+6.4$  ‰). IAEA-CH-6 was used in a similar fashion,  
23 where measured  $\delta^{13}\text{C} = -10.5 \pm 0.1$  ‰ (mean  $\pm$  1SD, n = 7; accepted  $-10.45$  ‰). A minimum of  
24 one in-house and one international standard was analyzed for every five samples. One  
25 methodological (*i.e.*, separate collagen isolation) duplicate and one sample (*i.e.*, re-analysis of  
26 same collagen) duplicate were included for every ten samples analyzed. Reproducibility between  
27 duplicates was  $\pm 0.3$  ‰ for  $\delta^{13}\text{C}$  and  $\pm 0.1$  ‰ for  $\delta^{15}\text{N}$ .

28

29 *Plant sample preparation and stable isotope analysis*

30 Terrestrial and macrophyte plant samples were collected from four different Canadian localities:  
31 Old Crow Basin, Yukon Territory; Whitehorse, Yukon Territory; Pinery Provincial Park, Ontario;  
32 and the London area, Ontario (Figure 1). Plant samples from Yukon Territory and London, Ontario  
33 were collected in August 2014. Aquatic macrophytes from Pinery Provincial Park were collected  
34 in August 2014, whereas terrestrial trees and shrubs were collected in August 2000. All plant  
35 sample collection sites were chosen from areas with minimal documented or perceived human  
36 impact.

37 After collection, plant samples were air-dried for a minimum of five days at room temperature.  
38 Subsamples were removed from the original specimen and washed in distilled water using a soft  
39 brush and fine mesh sieve. Subsamples were sonicated for ~60 seconds to remove adhering algae  
40 or debris. Washed subsamples were dried overnight at 90°C before being crushed into a fine  
41 powder using a ball mill. Then, sample powder was weighed into tin capsules for concurrent  
42 carbon isotope analysis, and carbon and nitrogen contents. These concurrent analyses allowed  
43 optimum sample weights to be recalculated based on individual plant nitrogen contents. New  
44 sample aliquots of appropriate weight were then analyzed for nitrogen isotope composition.

45 Analyses were performed using a Costech Elemental Analyzer coupled to a Thermo Scientific  
46 Delta Plus XL isotope ratio mass spectrometer operated in continuous-flow mode, using helium as  
47 the carrier gas. Values of  $\delta^{13}\text{C}$  were calibrated to VPDB using USGS-40 ( $\pm 0.1$  ‰ 1SD,  $n = 19$ ,  
48 accepted  $-26.4$ ‰) and USGS-41 ( $\pm 0.1$  ‰ 1SD,  $n = 20$ , accepted  $+37.6$ ‰). Keratin powder (in-  
49 house standard, MP Biomedicals Inc., Cat No. 90211, Lot No. 9966H) and IAEA-CH-6 were used  
50 to track analytical precision and accuracy. Keratin measured  $\delta^{13}\text{C} = -24.0 \pm 0.1$  ‰ (mean  $\pm$  1SD,  
51  $n = 38$ ; internally calibrated  $-24.0$  ‰). IAEA-CH-6 measured  $\delta^{13}\text{C} = -10.5 \pm 0.1$  ‰ (mean  $\pm$  1SD,  
52  $n = 14$ , accepted  $-10.45$  ‰).

53 Values of  $\delta^{15}\text{N}$  for the nitrogen-only analytical sessions were calibrated to AIR using USGS-40 ( $\pm$   
54  $0.1$  SD,  $n = 11$ ; accepted  $-4.5$  ‰) and USGS-41 ( $\pm 0.2$  ‰ SD,  $n = 15$ ; accepted  $+47.6$  ‰). NIST-  
55 1547 (Peach leaves) and keratin powder were used as in-house standards to track analytical  
56 precision and accuracy. Keratin measured  $\delta^{15}\text{N} = +6.5 \pm 0.1$  ‰ (mean  $\pm$  1SD,  $n = 31$ , internally  
57 calibrated  $+6.4$  ‰). NIST-1547 measured  $\delta^{15}\text{N} = +2.0 \pm 0.1$  ‰ (mean  $\pm$  1SD,  $n = 11$ , internally

58 calibrated +1.98 ‰). Analytical error for concurrent carbon and nitrogen, and N-only isotope  
59 measurements was  $\pm 0.2$  ‰. A minimum of one in-house and one international standard was  
60 analyzed for every five samples. One sample duplicate was included for every ten samples  
61 analyzed. Reproducibility between duplicates was  $\pm 0.3$  ‰ for  $\delta^{13}\text{C}$  and  $\pm 0.1$  ‰ for  $\delta^{15}\text{N}$ .

62

63 Table A. Taxonomic identification and stable isotope results for plant samples collected in Yukon Territory, Canada (August, 2014).  
 64 Plant taxonomic identification was completed using photographs from the field. The Yukon Territory lichen and terrestrial moss carbon  
 65 and nitrogen isotope data were not used in the SIAR mixing model. The carbon isotope data listed below are not corrected for the Suess  
 66 effect.

| Project sample<br>ID | Taxon                   | Common name   | Sample<br>origin | Functional<br>group | Sample type  | $\delta^{13}\text{C}$ (‰,<br>VPDB) | $\delta^{15}\text{N}$ (‰,<br>AIR) |
|----------------------|-------------------------|---------------|------------------|---------------------|--------------|------------------------------------|-----------------------------------|
| TP005                | <i>Utricularia sp.</i>  | Bladderwort   | Old Crow         | submerged           | bulk foliage | -29.7                              | +4.1                              |
| TP007                | <i>Potamogeton</i>      | Pond weed     | Old Crow         | submerged           | bulk foliage | -15.2                              | -2.7                              |
| TP008                | ?                       | Aquatic moss  | Old Crow         | submerged           | bulk foliage | -31.4                              | +0.5                              |
| TP010                | <i>Utricularia sp.</i>  | Bladderwort   | Old Crow         | submerged           | bulk foliage | -29.6                              | +5.1                              |
| TP011                | <i>Potamogeton</i>      | Pond weed     | Old Crow         | submerged           | entire plant | -20.9                              | +0.1                              |
| TP012A               | <i>Myriophyllum</i>     | Water milfoil | Old Crow         | submerged           | bulk foliage | -14.2                              | -0.9                              |
| TP016                | <i>Hippurus</i>         | Mare's tail   | Old Crow         | submerged           | bulk foliage | -30.6                              | +3.0                              |
| TP017A               | <i>Hippurus</i>         | Mare's tail   | Old Crow         | submerged           | bulk foliage | -32.4                              | +0.1                              |
| TP026A               | ?                       | Pond weed     | Old Crow         | submerged           | bulk foliage | -30.6                              | +1.2                              |
| TP030                | ?                       | Pond weed     | Old Crow         | submerged           | entire plant | -26.9                              | +0.6                              |
| TP031                | <i>Hippurus</i>         | Mare's tail   | Old Crow         | submerged           | bulk foliage | -32.3                              | +0.1                              |
| TP032                | <i>Hippurus</i>         | Mare's tail   | Old Crow         | submerged           | bulk foliage | -30.4                              | +2.3                              |
| TP034                | ?                       | Aquatic moss  | Old Crow         | submerged           | bulk foliage | -36.1                              | +0.8                              |
| TP035                | <i>Potamogeton</i>      | Pond weed     | Old Crow         | submerged           | bulk foliage | -23.2                              | -2.0                              |
| TP051A               | <i>Myriophyllum sp.</i> | Water milfoil | Whitehorse       | submerged           | bulk foliage | -13.1                              | +4.9                              |
| TP052A               | <i>Potamogeton sp.</i>  | Pond weed     | Whitehorse       | submerged           | bulk foliage | -14.8                              | +3.8                              |
| TP052B               | <i>Potamogeton sp.</i>  | Pond weed     | Whitehorse       | submerged           | bulk foliage | -14.8                              | +3.1                              |
| TP062                | ?                       | Pond weed     | Whitehorse       | submerged           | bulk foliage | -28.1                              | +5.5                              |
| TP089                | <i>Myriophyllum sp.</i> | Water milfoil | Whitehorse       | submerged           | bulk foliage | -41.2                              | +2.2                              |

|        |                                    |                 |            |          |                         |       |      |
|--------|------------------------------------|-----------------|------------|----------|-------------------------|-------|------|
| TP002  | <i>Menyanthes trifoliata</i>       | Buckbean        | Old Crow   | emergent | bulk foliage            | -30.4 | +1.3 |
| TP013A | <i>Carex</i>                       | Sedge           | Old Crow   | emergent | bulk foliage            | -30.3 | +0.9 |
| TP015  | <i>Equisetum fluviatile</i>        | Swamp horsetail | Old Crow   | emergent | bulk foliage            | -27.1 | +2.5 |
| TP025A | <i>Menyanthes trifoliata</i>       | Buckbean        | Old Crow   | emergent | bulk foliage            | -26.8 | +1.8 |
| TP027  | <i>Equisetum pratense</i>          | Shade horsetail | Old Crow   | emergent | bulk foliage            | -29.6 | +3.7 |
| TP053A | <i>Carex sp.</i>                   | Sedge           | Whitehorse | emergent | base of stem            | -27.8 | +5.9 |
| TP053B | <i>Carex sp.</i>                   | Sedge           | Whitehorse | emergent | bulk leaves &<br>seeds  | -27.9 | +6.4 |
| TP056  | ?                                  | Grass           | Whitehorse | emergent | bulk foliage            | -30.7 | +4.7 |
| TP057  | <i>Equisetum</i>                   | Horsetail       | Whitehorse | emergent | bulk foliage            | -27.5 | +6.6 |
| TP059A | <i>Sparganium sp.</i>              | Bur-reed        | Whitehorse | emergent | bulk foliage &<br>seeds | -28.2 | +4.8 |
| TP060A | <i>Carex sp.</i>                   | Sedge           | Whitehorse | emergent | bulk foliage &<br>seeds | -30.1 | +4.8 |
| TP060B | <i>Carex sp.</i>                   | Sedge           | Whitehorse | emergent | base of stem            | -28.3 | +5.0 |
| TP061  | <i>Sparganium sp.</i>              | Bur-reed        | Whitehorse | emergent | bulk foliage            | -28.5 | +4.6 |
| TP074A | <i>Carex sp.</i>                   | Sedge           | Whitehorse | emergent | bulk foliage            | -26.3 | +5.1 |
| TP074B | <i>Carex sp.</i>                   | Sedge           | Whitehorse | emergent | base of stem            | -25.6 | +4.5 |
| TP088  | <i>Hippurus</i>                    | Mare's tail     | Whitehorse | emergent | bulk foliage            | -35.3 | +4.0 |
| TP018  | <i>Lemna</i>                       | Duckweed        | Old Crow   | floating | entire plant            | -31.6 | +2.7 |
| TP050  | <i>Lemna trisulca</i>              | Duckweed        | Whitehorse | floating | entire plant            | -23.3 | +5.4 |
| TP028A | <i>Vaccinium vitis-idaea</i>       | Lingonberry     | Old Crow   | shrub    | bulk foliage            | -29.5 | -1.6 |
| TP043A | <i>Picea glauca</i>                | White spruce    | Old Crow   | tree     | bulk foliage            | -28.7 | -8.5 |
| TP043B | <i>Picea glauca</i>                | White spruce    | Old Crow   | tree     | wood                    | -24.3 | -6.8 |
| TP045A | <i>Alnus viridis subsp. crispa</i> | Mountain alder  | Old Crow   | tree     | bulk foliage            | -28.6 | -1.4 |
| TP046A | <i>Salix sp.</i>                   | Willow          | Old Crow   | tree     | bulk foliage            | -29.5 | +2.6 |
| TP046B | <i>Salix sp.</i>                   | Willow          | Old Crow   | tree     | wood                    | -29.2 | +1.1 |

|        |                                                     |                       |            |             |              |       |      |
|--------|-----------------------------------------------------|-----------------------|------------|-------------|--------------|-------|------|
| TP047  | <i>Salix sp.</i>                                    | Willow                | Old Crow   | tree        | bulk foliage | -28.9 | 0.0  |
| TP048A | <i>Alnus viridis subsp. crispa</i>                  | Mountain alder        | Old Crow   | tree        | bulk foliage | -28.3 | -1.2 |
| TP048B | <i>Alnus viridis subsp. crispa</i>                  | Mountain alder        | Old Crow   | tree        | wood         | -27.5 | -1.5 |
| TP049  | <i>Betula neoalaskana</i>                           | Alaskan birch         | Old Crow   | tree        | bulk foliage | -29.8 | -5.0 |
| TP063A | <i>Salix sp.</i>                                    | Willow                | Whitehorse | tree        | wood         | -30.5 | -0.9 |
| TP063B | <i>Salix sp.</i>                                    | Willow                | Whitehorse | tree        | bark         | -32.0 | +0.3 |
| TP064A | <i>Salix sp.</i>                                    | Willow                | Whitehorse | tree        | bulk foliage | -29.5 | +0.4 |
| TP064B | <i>Salix sp.</i>                                    | Willow                | Whitehorse | tree        | wood         | -27.9 | -0.5 |
| TP065A | <i>Viburnum edule</i>                               | Highbush<br>cranberry | Whitehorse | shrub       | bulk foliage | -31.1 | -3.7 |
| TP066  | <i>Shepherdia canadensis</i>                        | Buffalo berry         | Whitehorse | shrub       | bulk foliage | -30.8 | +0.1 |
| TP068  | <i>Populus tremuloides</i>                          | Aspen                 | Whitehorse | tree        | bulk foliage | -31.3 | -1.3 |
| TP071  | <i>Picea glauca</i>                                 | White spruce          | Whitehorse | tree        | bulk foliage | -27.5 | -1.3 |
| TP077  | <i>Salix sp.</i>                                    | Willow                | Whitehorse | tree        | bulk foliage | -28.5 | +3.9 |
| TP081  | <i>Betula glandulosa</i>                            | Shrub birch           | Whitehorse | tree        | bulk foliage | -30.3 | -1.5 |
| TP082  | <i>Rhododendron groenlandicum</i>                   | Labrador tea          | Whitehorse | shrub       | bulk foliage | -28.5 | -2.5 |
| TP087  | <i>Pinus contorta</i>                               | Lodgepole pine        | Whitehorse | tree        | bulk foliage | -27.7 | -2.1 |
| TP029  | ?                                                   | Moss                  | Old Crow   | terrestrial | bulk foliage | -33.2 | -1.1 |
| TP036A | ?                                                   | Lichen                | Old Crow   | terrestrial | entire plant | -24.8 | -4.0 |
| TP039  | <i>Peltigera aphthosa</i> or<br><i>leucophlebia</i> | Dog tooth lichen      | Old Crow   | terrestrial | entire plant | -33.9 | -0.5 |
| TP086  | <i>Peltigera leucophlebia</i>                       | Dog tooth lichen      | Whitehorse | lichen      | bulk plant   | -35.1 | -0.2 |

67

68

69

70

71 Table B. Taxonomic identification and stable isotope results for plant samples collected in Ontario, Canada (macrophyte samples  
 72 collected August, 2014; woody plant samples collected August, 2000). Macrophyte taxonomic identification was completed using  
 73 photographs from the field. The carbon isotope data listed below are not corrected for the Suess effect.

| Project sample ID | Taxon                           | Common name     | Sample origin          | Functional group | Sample type           | $\delta^{13}\text{C}$ (‰, VPDB) | $\delta^{15}\text{N}$ (‰, AIR) |
|-------------------|---------------------------------|-----------------|------------------------|------------------|-----------------------|---------------------------------|--------------------------------|
| TP091A            | <i>Myriophyllum</i>             | Water milfoil   | Pinery Provincial Park | submerged        | bulk foliage          | -18.6                           | -1.1                           |
| TP093             | <i>Utricularia sp.</i>          | Bladderwort     | Pinery Provincial Park | submerged        | bulk foliage          | -29.0                           | +2.4                           |
| TP095             | <i>Nitella sp.</i>              | Calcified algae | Pinery Provincial Park | submerged        | bulk foliage          | -19.2                           | -3.3                           |
| TP099             | <i>Myriophyllum</i>             | Water milfoil   | Pinery Provincial Park | submerged        | bulk foliage          | -23.9                           | -3.1                           |
| TP101A            | <i>Potamogeton sp.</i>          | Pond weed       | Pinery Provincial Park | submerged        | bulk foliage          | -13.1                           | +2.8                           |
| TP101B            | <i>Potamogeton sp.</i>          | Pond weed       | Pinery Provincial Park | submerged        | bulk foliage          | -12.9                           | +3.1                           |
| TP104             | <i>Utricularia macrorhiza</i>   | Bladderwort     | Pinery Provincial Park | submerged        | bulk foliage          | -29.9                           | +1.3                           |
| TP107             | <i>Heteranthera dubia</i>       | Water stargrass | Pinery Provincial Park | submerged        | bulk foliage          | -13.9                           | -3.5                           |
| TP108             | <i>Myriophyllum</i>             | Water milfoil   | Pinery Provincial Park | submerged        | bulk foliage          | -19.3                           | -3.1                           |
| TP110             | <i>Potamogeton sp.</i>          | Pond weed       | Pinery Provincial Park | submerged        | bulk foliage          | -16.4                           | -1.5                           |
| TP116             | ?                               | ?               | London Area            | submerged        | bulk foliage          | -23.4                           | +1.4                           |
| TP096A            | <i>Bidens (possibly cernua)</i> | Aster           | Pinery Provincial Park | emergent         | bulk leaves & flowers | -30.2                           | +1.3                           |
| TP097A            | ?                               | Grass           | Pinery Provincial Park | emergent         | bulk foliage          | -28.9                           | +0.2                           |
| TP097B            | ?                               | Grass           | Pinery Provincial Park | emergent         | base of stem          | -28.8                           | +0.1                           |
| TP098             | ?                               | Grass           | Pinery Provincial Park | emergent         | bulk foliage          | -29.3                           | +4.2                           |
| TP112             | <i>Typha</i>                    | Bulrush         | London Area            | emergent         | base of stem          | -31.2                           | +1.8                           |
| TP113             | <i>Typha</i>                    | Bulrush         | London Area            | emergent         | bulk cattail          | -28.3                           | +4.3                           |
| TP114             | ?                               | Arrowhead       | London Area            | emergent         | bulk foliage          | -30.7                           | +1.6                           |

|                      |                                |                |                        |          |              |       |       |
|----------------------|--------------------------------|----------------|------------------------|----------|--------------|-------|-------|
| TP117A               | <i>Typha</i>                   | Bulrush        | London Area            | emergent | bulk foliage | -31.1 | +1.8  |
| TP094                | <i>Lemna sp.</i>               | Duckweed       | Pinery Provincial Park | floating | entire plant | -28.4 | +1.0  |
| TP102                | <i>Potamogeton sp.</i>         | Pond weed      | Pinery Provincial Park | floating | bulk foliage | -25.7 | +0.1  |
| TP103                | <i>Nuphar variegata</i>        | Pond lily      | Pinery Provincial Park | floating | bulk flower  | -24.7 | +1.5  |
| TP111A               | ?                              | Arrowhead      | London Area            | floating | bulk foliage | -28.3 | +7.2  |
| TP118                | <i>Nuphar</i>                  | Pond lily      | London Area            | floating | bulk foliage | -26.2 | +6.3  |
| TP119A               | <i>Populus</i>                 | Aspen          | London Area            | tree     | bulk foliage | -27.6 | -0.8  |
| TP119B               | <i>Populus</i>                 | Aspen          | London Area            | tree     | wood         | -25.7 | -1.2  |
| VEG T O-B AUG1/00#1A | <i>Juniperus virginiana</i>    | Red cedar      | Pinery Provincial Park | tree     | bulk foliage | -27.1 | -3.5  |
| VEG T O-B AUG1/00#1B | <i>Juniperus virginiana</i>    | Red cedar      | Pinery Provincial Park | tree     | bulk twig    | -26.5 | -3.1  |
| VEG S O-B AUG1/00#1A | <i>Populus balsamifera</i>     | Balsam poplar  | Pinery Provincial Park | shrub    | bulk foliage | -28.3 | -4.2  |
| VEG S O-B AUG1/00#1B | <i>Populus balsamifera</i>     | Balsam poplar  | Pinery Provincial Park | shrub    | bulk twig    | -26.6 | -6.4  |
| VEG S O-B AUG1/00#2A | <i>Juniperus communis</i>      | Common juniper | Pinery Provincial Park | shrub    | bulk foliage | -25.9 | -5.3  |
| VEG S O-B AUG1/00#2B | <i>Juniperus communis</i>      | Common juniper | Pinery Provincial Park | shrub    | bulk twig    | -23.9 | -5.8  |
| VEG S O-B AUG1/00#3A | <i>Prunus serotinia</i>        | Black cherry   | Pinery Provincial Park | shrub    | bulk foliage | -27.8 | -2.0  |
| VEG S O-B AUG1/00#3B | <i>Prunus serotinia</i>        | Black cherry   | Pinery Provincial Park | shrub    | bulk twig    | -26.7 | -2.4  |
| VEG S O-A AUG3/00#1A | <i>Juniperus communis</i>      | Common juniper | Pinery Provincial Park | shrub    | bulk foliage | -25.7 | -6.6  |
| VEG S O-A AUG3/00#1B | <i>Juniperus communis</i>      | Common juniper | Pinery Provincial Park | shrub    | bulk twig    | -24.4 | -6.0  |
| VEG S O-A AUG3/00#2A | <i>Populus balsamifera</i>     | Balsam poplar  | Pinery Provincial Park | shrub    | bulk foliage | -26.9 | -7.5  |
| VEG S O-A AUG3/00#3A | <i>Arctostaphylos uva-ursi</i> | Bear berry     | Pinery Provincial Park | shrub    | bulk foliage | -28.5 | -9.5  |
| VEG S O-A AUG3/00#3B | <i>Arctostaphylos uva-ursi</i> | Bear berry     | Pinery Provincial Park | shrub    | bulk twig    | -26.6 | -10.6 |



|                   |                                 |                |                        |       |              |       |      |
|-------------------|---------------------------------|----------------|------------------------|-------|--------------|-------|------|
| VEG T1AUG11/00#1A | <i>Prunus serotina</i>          | Black cherry   | Pinery Provincial Park | tree  | bulk foliage | -28.5 | -4.7 |
| VEG T1AUG11/00#1B | <i>Prunus serotina</i>          | Black cherry   | Pinery Provincial Park | tree  | bulk twig    | -28.4 | -3.8 |
| VEGT1AUG11/00#2A  | <i>Juniperus virginiana</i>     | Red cedar      | Pinery Provincial Park | tree  | bulk foliage | -28.5 | -5.1 |
| VEGT1AUG11/00#2B  | <i>Juniperus virginiana</i>     | Red cedar      | Pinery Provincial Park | tree  | bulk twig    | -27.2 | -3.8 |
| VEGT1AUG11/00#3A  | <i>Quercus velutina</i>         | Black oak      | Pinery Provincial Park | tree  | bulk foliage | -28.5 | -5.9 |
| VEGT1AUG11/00#3B  | <i>Quercus velutina</i>         | Black oak      | Pinery Provincial Park | tree  | bulk twig    | -26.9 | -5.1 |
| VEGT1AUG11/00#4A  | <i>Pinus strobus</i>            | White pine     | Pinery Provincial Park | tree  | bulk foliage | -30.7 | -3.7 |
| VEGT1AUG11/00#4B  | <i>Pinus strobus</i>            | White pine     | Pinery Provincial Park | tree  | bulk twig    | -30.1 | -5.2 |
| VEGT1AUG11/00#5A  | <i>Quercus prinoides</i>        | Chinquapin oak | Pinery Provincial Park | tree  | bulk foliage | -28.5 | -4.0 |
| VEGT1AUG11/00#5B  | <i>Quercus prinoides</i>        | Chinquapin oak | Pinery Provincial Park | tree  | bulk twig    | -28.1 | -4.3 |
| VEGS1AUG3/00#2A   | <i>Symphoricarpos<br/>duham</i> | Snowberry      | Pinery Provincial Park | shrub | bulk foliage | -30.3 | -7.6 |
| VEGS1AUG3/00#2B   | <i>Symphoricarpos<br/>duham</i> | Snowberry      | Pinery Provincial Park | shrub | bulk twig    | -29.8 | -8.5 |
| VEGT2AUG16/00#1A  | <i>Pinus strobus</i>            | White pine     | Pinery Provincial Park | tree  | bulk foliage | -29.0 | -3.3 |
| VEGT2AUG16/00#1B  | <i>Pinus strobus</i>            | White pine     | Pinery Provincial Park | tree  | bulk twig    | -27.7 | -4.0 |
| VEGT2AUG16/00#2A  | <i>Quercus velutina</i>         | Black oak      | Pinery Provincial Park | tree  | bulk foliage | -27.8 | -4.6 |
| VEGT2AUG16/00#2B  | <i>Quercus velutina</i>         | Black oak      | Pinery Provincial Park | tree  | bulk twig    | -27.8 | -4.9 |
| VEGT2AUG16/00#4A  | <i>Prunus serotina</i>          | Black cherry   | Pinery Provincial Park | tree  | bulk foliage | -29.5 | -5.7 |
| VEGT2AUG16/00#4B  | <i>Prunus serotina</i>          | Black cherry   | Pinery Provincial Park | tree  | bulk twig    | -28.7 | -5.4 |
| VEGT2AUG16/00#5A  | <i>Prunus virginiana</i>        | Choke cherry   | Pinery Provincial Park | tree  | bulk foliage | -29.9 | -2.5 |
| VEGT2AUG16/00#5B  | <i>Prunus virginiana</i>        | Choke cherry   | Pinery Provincial Park | tree  | bulk twig    | -29.9 | -4.1 |
| VEGS2AUG16/00#1A  | <i>Symphoricarpos<br/>duham</i> | Snowberry      | Pinery Provincial Park | shrub | bulk foliage | -30.7 | -5.2 |
| VEGT5AUG21/00#1A  | <i>Pinus strobus</i>            | White pine     | Pinery Provincial Park | tree  | bulk foliage | -27.9 | -4.7 |
| VEGT5AUG21/00#1B  | <i>Pinus strobus</i>            | White pine     | Pinery Provincial Park | tree  | bulk twig    | -27.2 | -5.8 |
| VEGT5AUG21/00#3A  | <i>Quercus alba</i>             | White oak      | Pinery Provincial Park | tree  | bulk foliage | -29.7 | -5.0 |

|                   |                            |                |                        |       |              |       |      |
|-------------------|----------------------------|----------------|------------------------|-------|--------------|-------|------|
| VEGT5AUG21/00#3B  | <i>Quercus alba</i>        | White oak      | Pinery Provincial Park | tree  | bulk twig    | -30.1 | -5.9 |
| VEGS5AUG21/00/#1A | <i>Rhus aromatica</i>      | Fragrant sumac | Pinery Provincial Park | shrub | bulk foliage | -29.2 | -7.8 |
| VEGS5AUG21/00#2A  | <i>Vaccinium</i>           | Blueberry      | Pinery Provincial Park | shrub | bulk foliage | -30.7 | -4.7 |
| VEGS5AUG21/00#2B  | <i>Vaccinium</i>           | Blueberry      | Pinery Provincial Park | shrub | bulk twig    | -30.1 | -4.6 |
| VEGS5AUG21/00#3A  | <i>Rubus</i>               | Raspberry      | Pinery Provincial Park | shrub | bulk foliage | -30.6 | -5.1 |
| VEGS5AUG21/00#3B  | <i>Rubus</i>               | Raspberry      | Pinery Provincial Park | shrub | bulk twig    | -30.5 | -5.4 |
| VEGS5AUG21/00#6A  | <i>Prunus virginiana</i>   | Choke cherry   | Pinery Provincial Park | shrub | bulk foliage | -29.1 | -6.2 |
| VEGS.5AUG03/00#2A | <i>Populus balsamifera</i> | Balsam poplar  | Pinery Provincial Park | shrub | bulk foliage | -29.8 | -4.5 |
| VEGS.5AUG03/00#2B | <i>Populus balsamifera</i> | Balsam poplar  | Pinery Provincial Park | shrub | bulk twig    | -27.4 | -5.4 |

74

75

76

77

78

79

80

81

82

83

84

85 Table C. Summary of plant functional group  $\delta^{13}\text{C}$  and  $\delta^{15}\text{N}$ .

| Plant functional group       | (n)  | $\delta^{13}\text{C}_{\text{mean}}$ (‰, VPDB) | $\delta^{13}\text{C}_{\text{range}}$ (‰, VPDB) | $\delta^{15}\text{N}_{\text{mean}}$ (‰, AIR) | $\delta^{15}\text{N}_{\text{range}}$ (‰, AIR) |
|------------------------------|------|-----------------------------------------------|------------------------------------------------|----------------------------------------------|-----------------------------------------------|
| <i>Yukon Territory sites</i> |      |                                               |                                                |                                              |                                               |
| Submerged                    | (19) | -26.1                                         | -41.2 to -13.1                                 | +1.7                                         | -2.7 to +5.5                                  |
| Emergent                     | (16) | -28.8                                         | -35.3 to -25.6                                 | +4.2                                         | +0.9 to +6.6                                  |
| Floating                     | (2)  | -27.5                                         | -31.6 to -23.3                                 | +4.1                                         | +2.7 to +5.4                                  |
| Terrestrial                  | (22) | -29.1                                         | -32.0 to -24.3                                 | -1.4                                         | -8.5 to +3.9                                  |
| <i>Ontario sites</i>         |      |                                               |                                                |                                              |                                               |
| Submerged                    | (11) | -20.0                                         | -29.2 to -12.9                                 | -0.4                                         | -3.5 to +3.1                                  |
| Emergent                     | (8)  | -29.8                                         | -31.2 to -28.3                                 | +1.9                                         | +0.1 to +4.3                                  |
| Floating                     | (5)  | -26.6                                         | -28.4 to -24.7                                 | +3.2                                         | +0.1 to +7.2                                  |
| Terrestrial                  | (48) | -28.3                                         | -30.7 to -29.9                                 | -5.0                                         | -10.6 to -0.8                                 |

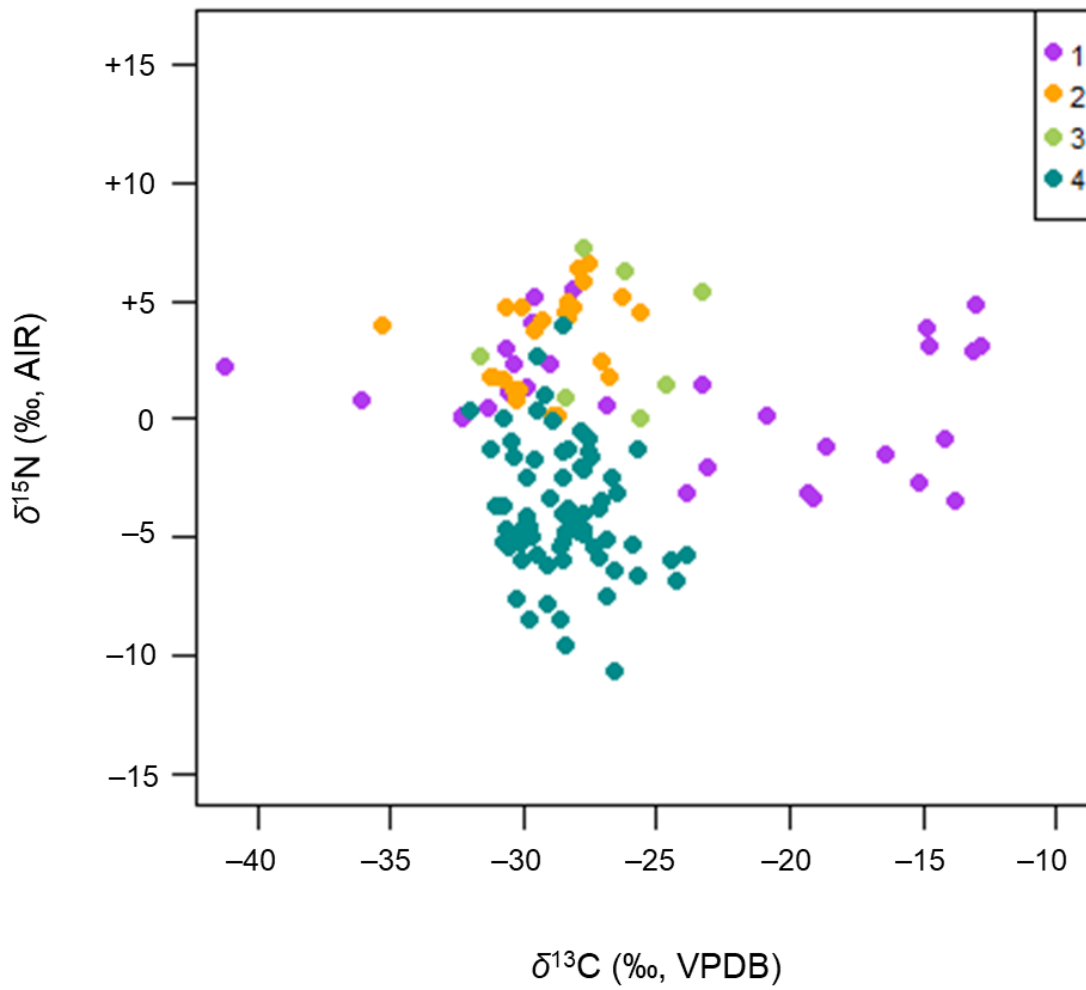

Figure A. Bivariate plot generated in SIBER for plant  $\delta^{13}\text{C}$  and  $\delta^{15}\text{N}$ . 1 – Submerged macrophytes. 2 – Emergent macrophytes. 3 – Floating macrophytes. 4 – Terrestrial trees and shrubs.

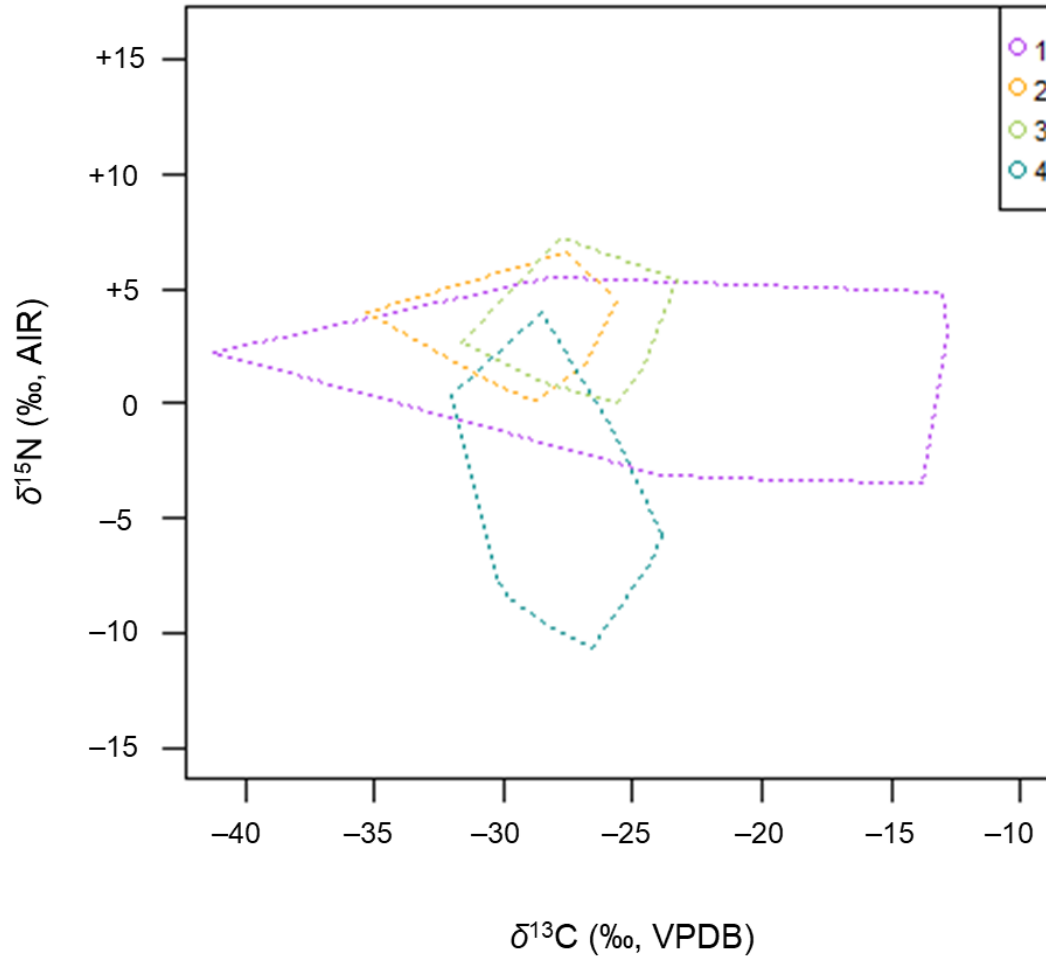

Figure B. Total Area Convex Hulls generated in SIBER for plant isotopic composition. The area of each hull denotes the size of the isotopic niche for each plant functional group. 1 – Submerged macrophytes. 2 – Emergent macrophytes. 3 – Floating macrophytes. 4 – Terrestrial trees and shrubs.

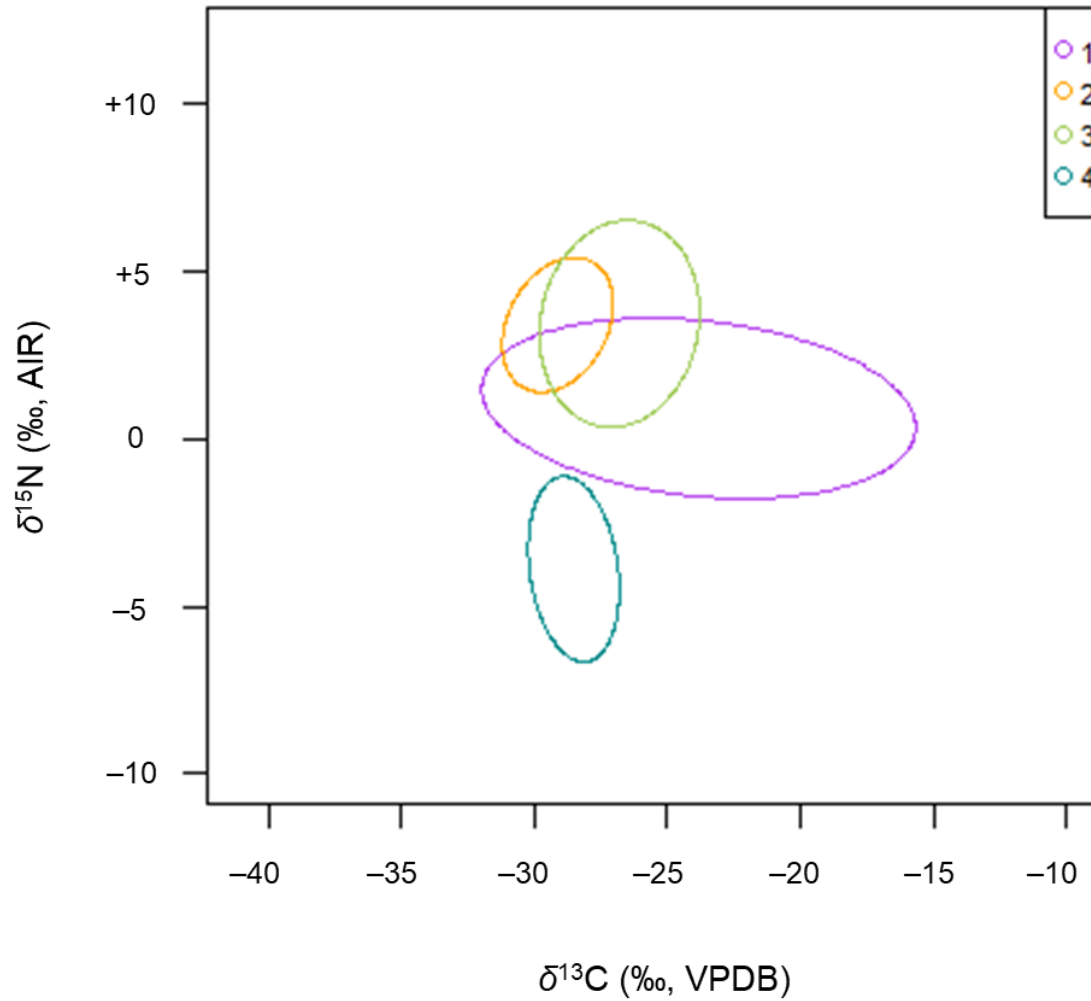

Figure C. Small Sample Size Corrected Standard Ellipses generated in SIBER for plant isotopic composition. Each ellipse displays 40% of the data per plant functional group. 1 – Submerged macrophytes. 2 – Emergent macrophytes. 3 – Floating macrophytes. 4 – Terrestrial trees and shrubs.

90

91

92

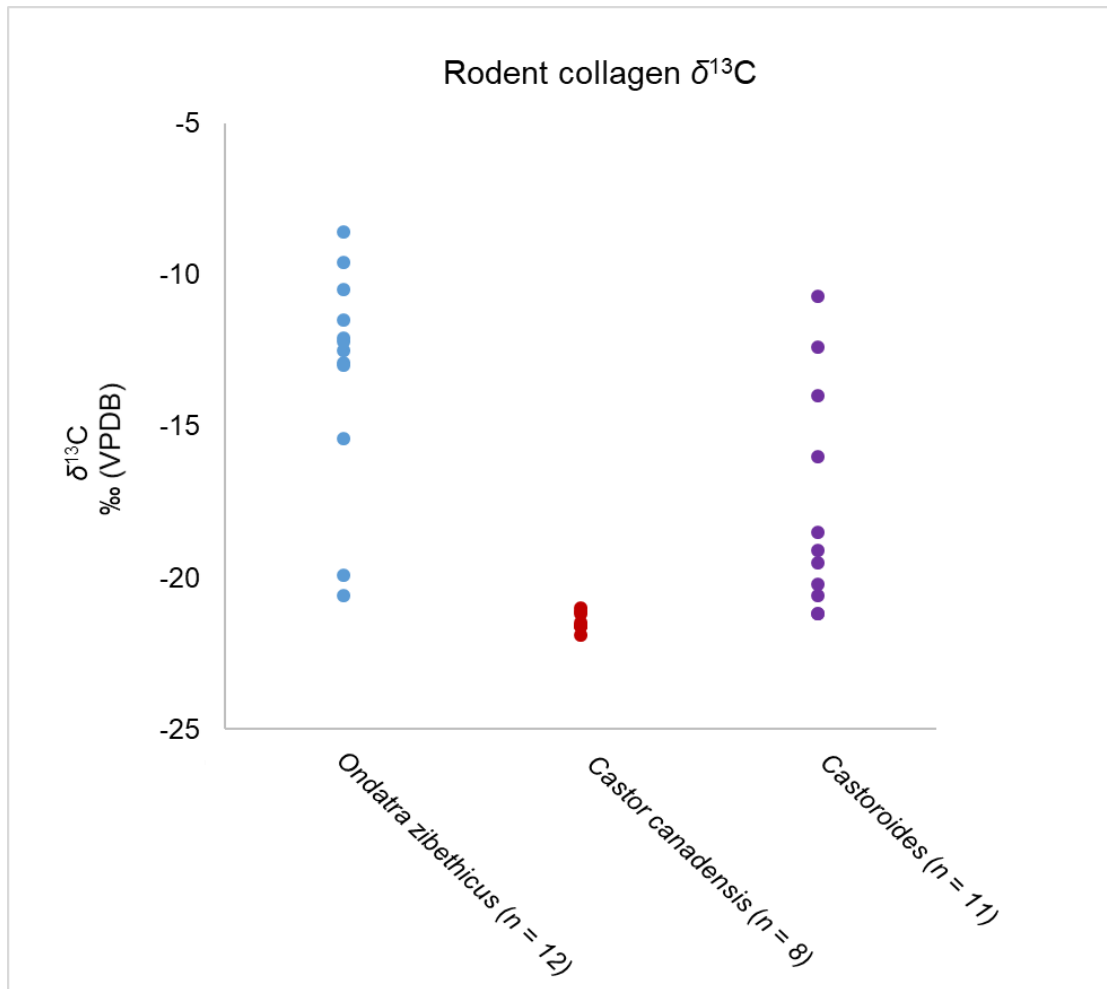

93

Figure D. Semi-aquatic rodent  $\delta^{13}\text{C}_{\text{col}}$  (this study) supports the interpretation that *Castoroides* consumed  $^{13}\text{C}$ -enriched macrophytes (noting that macrophytes have a very wide range of  $\delta^{13}\text{C}$ ) and that *Castor canadensis* consumed more  $^{13}\text{C}$ -depleted terrestrial plant resources (noting that trees and shrubs have a narrow range of low  $\delta^{13}\text{C}$ ). Modern *Ondatra zibethicus* and *Castor canadensis* collagen  $\delta^{13}\text{C}_{\text{col}}$  are corrected for the Suess effect.

94

95

96

97

98 References

- 99 Longin, R. New method of collagen extraction for radiocarbon dating. *Nature* **230**, 241 (1971).
